# Supplementary material
Source: PubMed Central journal article supplement (PMC2242707)

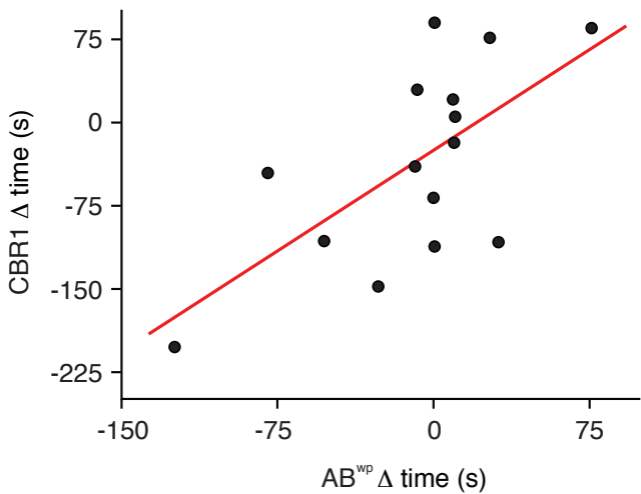

Supplement: pnas_0708778105_1.pdf [file pnas_0708778105_1.pdf]
